# Supplementary material
Source: ML conference proceedings conference paper supplement (https://openaccess.thecvf.com/content/CVPR2021/html/Baek_Polka_Lines_Learning_CVPR_2021_paper.html)
Supplement: Supplementary file 2 [file Baek_Polka_Lines_Learning_CVPR_2021_supplemental.zip]

Archive with 2 entries (2 files):
- 05093-demo.mp4
- 05093-supp_c.pdf
